# Supplementary material for: Utilization of wearable devices in pediatric oncology: A Scoping Review
Source: Research Square preprint supplement (doi:10.21203/rs.3.rs-6517066/v1), 2025-05-07
Supplement: Supplementary file 1 [file 039ad90eeae5a9eb34258f3a.docx]

**Supplementary Material 2: Detailed description of wearable device and any reported benefits or inefficacies.**

| **Ref** | **Device Brand** | **Device Name** | **Where is the device worn?** | **Expected wear time** | **Minimum wear time** | **Physiological/Activity Data collected** |
| --- | --- | --- | --- | --- | --- | --- |
| **Wearable Device Use: Data Collection Tool (n=61)** | | | | | | |
| Muller 2016 | Modus Health | StepWatch 3 Activity Monitor | Ankle | 7 days | 7 days - 8 hours/day | Activity  Steps |
| Rosen 2015 | Ambulatory Monitoring Inc | MicroMini Motionlogger | Wrist | 28 days | NR | Sleep |
| Muller 2014 | Orthocare Innovations | StepWatch 3TM Activity Monitor | Ankle | NR | 7 days - 8 hours/day | Activity |
| Rogers 2014 | Ambulatory Monitoring Inc | Mini Motionlogger AAM-32 | Wrist | 10 days | 72 hours prior  AND  72 hours after DEX | Sleep  Activity |
| Marmol-Perez 2024 | ActiGraph | wGT3x-BT | Wrist | 7 days | 1 day  16hrs/day | Sleep  Activity |
| Bratteteig 2024 | ActiGraph | GT3x-BT | Hip | 8 days | 3 days  8hrs/day | Activity |
| Ha 2023 | Activinsights | GeneActiv | Wrist | 7 days | 3 days  10 hrs/day | Activity  Steps |
| Grydeland 2023 | ActiGraph | GT3X+ | Hip | 7 days | 1 day  8 hrs/day | Activity |
| Hooke 2023 | ActiGraph | GT3X+ | Wrist | 7 days | 3 weekdays  6hrs/day  AND  1 weekend day  6 hrs/day | Sleep  Activity |
| Gaser 2022 | Movisens | Move 3 | Hip | NR | 4 days  8 hrs/day | Activity  Steps |
| Rehorst-Kleinlugtenbelt 2019 | Philips Respironics | Actical | Hip | 7 days  8 hrs/day | 4 days  8 hrs/day | Activity  Steps |
| Nunes 2019 | Ambulatory Monitoring Inc | NR | Wrist | 72 hours | NR | Sleep |
| Johnson 2018 | NR | Actigraph | Wrist | 7 nights | NR | Sleep |
| Darezzo 2015 | NR | NR | Wrist | 5 days | NR | Sleep |
| Van Deuren 2020 | NR | Actometer | Ankle | 14 days | NR | Activity |
| Traube 2020 | Ambulatory Monitoring Inc | Micro Motionlogger | Wrist or ankle | 3 days | NR | Sleep |
| Hooke 2019 | ActiGraph | GT3X+ | Waist | 3 days at every time point (9 days) | Every time point for 2 days  10 hrs/day | Activity  Steps |
| Matthews 2014 | Philips Respironics | Actigraph Version 5.71 | Wrist | 7 days | 4 days | Sleep |
| Nessle 2022 | BlueSpark Technologies | TempTraq WD | Skin | After G-CSF administration or anytime patient is neutropenic/ or looking unwell | NR | Temperature |
| Fiuza-Luces 2017 | ActiGraph | GT3X | NR | 7 days | 4 days (including 1 weekend day) 10 hrs/day | Activity |
| Grimshaw 2024 | FitBit | NR | Wrist | NR | 8 hours/day | Activity  Steps |
| Pitt 2023 | Garmin | VivoFit Activity Tracker | NR | 14 days | NR | Sleep  Activity  Steps |
| Williamson 2023 | FitBit | FitBit Flex Tracker | Wrist | 1 year | 5+ days/week  4+ weeks | Sleep  Activity  Steps  Calories burnt |
| Hoag 2022 | FitBit | FitBit Charge HR | Wrist | 3 days | 80% of 24-hour period | HR  Steps |
| Koenig 2024 | **Device 1:** greenTEG  **Device 2:** Biovotion | **Device 1:** CORE  **Device 2:** Everion VSM-1 | Upper Arm or Leg | 14 days | 7+ days  18 hrs/day | **Device 1:** Temperature  **Device 2:**  HR  Respiratory Rate  Temperature |
| Swartz 2020 | FitBit | Alta HR  OR  Inspire HR  OR  Fitbit Ace | Wrist | NR | NR | HR  Activity  Steps |
| Dalla 2023 | FitBit | NR | NR | NR | NR | Activity |
| DeNysschen 2021 | FitBit | Fitbit Flex | Wrist | 10 weeks | No minimum time required | Steps |
| Wang 2024 | Ambulatory Monitoring Inc | Motionlogger MicroWatch Actigraph | Wrist | NR | 5 nights | Sleep |
| Lazar 2023 | BTL | BTL HOLTER | Chest/hip | 24 Hours at baseline  AND  24 hours after half of total anthracycline dose | 24 hours at 2 time points | HR  ECG  Heart Rhythm |
| Vyhlidal 2022 | ActiGraph | wGT3X-BT | Wrist | 12 days except when swimming or bathing | NR | Sleep |
| Bratteteig 2022 | ActiGraph | GT3X-BT | Hip | 8 Days | 3+ days - 8hours/day | Activity  Steps |
| Gaser 2022 | Movisens | Move 3 Accelerometer | NR | 7 days | 4 days  8 hrs/day | Activity  Steps |
| Vyhlidal 2022 | ActiGraph | wGT3X+ | Wrist | 20 days | 4 days  16+ hrs/day (including 1 weekend day) | Activity  Steps |
| Steur 2020 | ActiGraph | wGT3X-BT | Wrist | 7 days | 72 hours | Sleep |
| Pickering 2021 | Philips Respironics | Actiwatch Spectrum PRO | Wrist | 2 weeks | NR | Sleep  Activity |
| Rogers 2020 | Philips Respironics | AW2 Actigraph | Wrist | 7 days | 72 hours | Activity  Steps |
| Orsey 2016 | Philips Respironics | Actiwatch 2 | Wrist | 7 days | NR | Sleep  Activity |
| Setoyama 2016 | Philips Respironics | Actiwatch 2 | Wrist | 3 days | Limitation of the study - need 5+ days | Sleep  Activity |
| Jacobs 2016 | Ambulatory Monitoring Inc | Mini Motionlogger AAM-32 | Wrist | 4-5 days | NR | Sleep |
| Daniel 2024 | Ambulatory Monitoring Inc | Micro Motionlogger | NR | 15 days | NR | Sleep |
| Vyhlidal 2023 | Axivity | AX3 Accelerometer | Wrist | 7 days | 4 days (including 1 weekend day) 16hrs/day (8 hours needed to be during waking hours) | Activity  Steps |
| Merz 2023 | Philips Respironics | Actiwatch 2 | Wrist | 7 nights | NR | Sleep |
| Wu 2023 | ActiGraph | GT3X | Hip | 3 days | NR | Steps |
| Van Hulst 2023 | ActiGraph | wGT3X-BT | Wrist | 14 days | NR | Sleep |
| Withycombe 2022 | Garmin | Garmin VivoFit 3 | Wrist | 7 days  2 time points | 4 days at each time point  10 hrs/day | Steps |
| Gotte 2023 | ActiGraph | wGT3X-BT | Hip | 7 days | 4 days & 1 weekend day 8hrs/day | Activity  Steps |
| Miller 2021 | ActiGraph | GT3x | Hip | 7 days at baseline, 2 weeks after first exercise session, 2 weeks after second exercise session (5 weeks total) | 3 days & 1 weekend day 6hrs/day | Activity  Steps |
| Steur 2020 | ActiGraph | wGT3X-BT | Wrist | 7 days | NR | Sleep  Activity |
| Rogers 2020 | Ambulatory Monitoring Inc | Micromini Actigraph | Wrist | 5 days | 72 hours | Sleep  Activity |
| Steur 2020 | ActiGraph | wGT3X-BT | Wrist | 7 days | 72 hours | Sleep |
| Rogers 2019 | Ambulatory Monitoring Inc | Micromini Actigraph | Wrist | 5 days | 72 hours | Sleep |
| Van Dijk-Lokkart 2019 | Philips Respironics | Actical Activity Monitor B Series | Hip | 4 days | 500min/day | Activity  Steps |
| Hamari 2019 | Fitbit | Fitbit Ultra | Waist | 1 week | 8 hours/day | Steps |
| Long 2018 | Philips Respironics | Actical Accelerometer | Hip | 7 days | 3 days | Sleep  Activity  Steps |
| Graef 2018 | Ambulatory Monitoring Inc | Micro-mini Motionlogger | Wrist | 5 nights | NR | Sleep |
| Zupanec 2017 | Ambulatory Monitoring Inc | Mini  Motionlogger | Wrist | 5 nights | Around 3 days/nights | Sleep |
| Gundle 2017 | FitBit | FitBit one | Waist | Wear daily until battery dies | 4+ days | Activity  Steps |
| Gotte 2017 | Orthocare Innovations | Step Watch 3 Activity Monitor | NR | NR | NR | Activity  Steps |
| Sabel 2016 | SWA BodyMedia | SenseWear Pro 2 Armband | Upper Arm | 1 week at baseline and every second week of the intervention | 14 hours | Activity  Temperature |
| Braam 2016 | Philips Respironics | Actical MiniMitter | Hip | 4 days | 500min/day | Activity |

| **Wearable Device Use: Investigational Tool (n=16)** | | | | | | |
| --- | --- | --- | --- | --- | --- | --- |
| Misawa 2024 | Meta Quest | Meta Quest 2/Pro | Headset | 13 (3 hrs) or 21 (5hrs) sessions | NR | Eye Movement  Head Movement |
| Savas 2024 | **Device 1:** Oculus  **Device 2:**  NR | **Device 1:**  Oculus Quest 2  **Device 2:** ADXL354 | **Device 1:**  Headset  **Device 2:**  Chest | NR | NR | **Device 1:**  VR device (biofeedback)  **Device 2:**  Respiratory Rate |
| Savas 2024 | **Device 1:**  Oculus  **Device 2:**  NR | **Device 1:**  Oculus Quest 2  **Device 2:** ADXL354 | **Device 1:**  Headset  **Device 2:**  Chest | During port catheter needle insertion | NR | **Device 1:**  VR device (biofeedback)  **Device 2:**  Respiratory Rate |
| Ovans 2018 | FitBit | FitBit Flex Tracker | Wrist | 12 weeks with option to extend for 24 weeks | 12 weeks | Steps |
| Ha 2022 | Activinsights | GENEActiv | NR | 2 weeks | <10 hours/day  OR  within 1 day there was more than 80% sedentary activity  OR  valid days was less than 3 | Activity |
| Krnavek 2021 | NR | Wrist-worn Frailty Meter | Wrist | 5 minutes | 5 minutes | Angular velocity of the arm |
| Gotte 2018 | Fitbit | FitBit one or Fitbit Flex | Pocket or wrist | 6-8 weeks | NR | Activity  Steps  Calories burnt |
| Haemmerli 2022 | Biovotion | Everion  VSM-1 | Wrist | NR | NR | HR  Respiratory Rate  Blood Oxygen  Temperature |
| Koenig 2021 | Biovotion | Everion  VSM-1 | Upper Arm or Leg | As often as possible for 14 days | NR | HR  Respiratory Rate  Blood Oxygen  Temperature |
| Devine 2020 | ActiGraph | wGT3X-BT | Wrist | NR | 4 days  10+ hrs/day | Activity |
| Yurkiewicz 2018 | Fitbit | NR | NR | NR | NR | Sleep  Steps |
| Mendoza 2017 | Fitbit | Fitbit Flex | Wrist | 10 weeks | 4 days  8+ hrs/day | Activity  Steps  Calories burnt |
| Le 2017 | Fitbit | Fitbit One | Waist | 6 months | NR | Activity  Steps  Blood Oxygen |
| Hooke 2016 | Fitbit | FitBit One | Waist | 22 days | 15 days | Activity  Steps |
| Fuemmeler 2020 | ActiGraph | GT3X+ | Waist | 6 days - 24/7 | 5 days  5 hrs/day | Activity  Steps |
| Howell 2018 | ActiGraph | wGT3X-BT | Wrist | 24 weeks | NR | Activity  Steps |

**Table 1:** **Detailed description of wearable device.**

NR, not reported

| **Ref** | **Acceptability** | **Technical Issues** | **Adverse Effects** |
| --- | --- | --- | --- |
| **Wearable Device Use: Data Collection Tool (n=61)** | | | |
| Muller 2016 | 8 patients lost interest in study/wearing device | 3 (incomplete data), 2 (lost accelerometer in mail) | NR |
| Rosen 2015 | NR | 6 (incorrectly wearing), 1 (lost device) | NR |
| Muller 2014 | NR | NR | NR |
| Rogers 2014 | NR | 13 equipment failure or non-compliance | NR |
| Marmol-Perez 2024 | NR | NR | NR |
| Bratteteig 2024 | NR | NR | NR |
| Ha 2023 | NR | Does not record all activity (e.g. swimming) | NR |
| Grydeland 2023 | NR | Accelerometers can't detect all activities (e.g. swimming, cycling or resistance training) | NR |
| Hooke 2023 | Children reported not feeling comfortable wearing the actigraph at school or social settings | Actigraph could not determine all body movements | NR |
| Gaser 2022 | Younger children (ages 4–7) often find hip-worn wearables uncomfortable; wrist-worn sensors are generally better tolerated and more suitable for this age group. | NR | NR |
| Rehorst-Kleinlugtenbelt 2019 | All patients reported the Actical was well-accepted, and the burden and risk was negligible | NR | NR |
| Nunes 2019 | NR | NR | NR |
| Johnson 2018 | NR | NR | NR |
| Darezzo 2015 | NR | NR | NR |
| Van Deuren 2020 | NR | NR | NR |
| Traube 2020 | NR | NR | NR |
| Hooke 2019 | Patients reported discomfort with wearing the actigraph on their waist, expressing that it made them feel 'different' or self-conscious. | NR | NR |
| Matthews 2014 | NR | NR | NR |
| Nessle 2022 | NR | NR | NR |
| Fiuza-Luces 2017 | NR | NR | NR |
| Grimshaw 2024 | Some patients found it uncomfortable to wear when unwell or forgot to charge device | Some patients had issues with syncing the Fitbit | Some issues with security on FitBit dashboard |
| Pitt 2023 | NR | NR | NR |
| Williamson 2023 | Only 30.6% of participants consistently wore the Fitbit throughout the study period. Many participants struggled to remember to wear the device after charging, and some expressed concerns about losing or damaging it. Adolescents were less engaged and accepting of wearable devices. Without incentives, only 30.6% of participants were willing to wear the watch consistently. | Due to issues with the API, data was lost for eight participants. Additionally, four patients did not sync their devices within 30 days, resulting in further data loss. It is essential to establish a reliable data syncing process early in the study to prevent similar issues. | NR |
| Hoag 2022 | Fitbit wristbands not appropriate size for small kids | Fitbit lacks the sensitivity to identify the differences between sleeping and awake | NR |
| Koenig 2024 | The core wearable was worn more frequently than the Everion. Patients considered both devices suitable for temperature recording, with no significant concerns regarding comfort or charging. However, some patients expressed uncertainty when reviewing their data feedback. | Accessing gateway for Everion to allow data transfer was tedious. More technical issues with Everion for data syncing (may be why patients were not as compliant with wearing this device). | 4 participants reported occasional sweating under the wearable device leading to irritated skin (3 patients needed some sort of intervention, 1 was fine). |
| Swartz 2020 | Research assistants spent 30% of their time contacting participants to get the FitBit data (team would implement automated reminders next time). | NR | NR |
| Dalla 2023 | Some kids really enjoyed wearing it, others weren't interested. Might depend on age of the child. | NR | NR |
| DeNysschen 2021 | NR | NR | NR |
| Wang 2024 | NR | NR | NR |
| Lazar 2023 | NR | NR | NR |
| Vyhlidal 2022 | NR | NR | NR |
| Bratteteig 2022 | NR | NR | NR |
| Gaser 2022 | NR | NR | NR |
| Vyhlidal 2022 | NR | NR | NR |
| Steur 2020 | NR | NR | NR |
| Pickering 2021 | NR | NR | NR |
| Rogers 2020 | NR | 1 patient had technical issues with the actigraph. | NR |
| Orsey 2016 | NR | NR | NR |
| Setoyama 2016 | NR | NR | NR |
| Jacobs 2016 | NR | NR | NR |
| Daniel 2024 | NR | Actigraphy estimates of sleep use algorithms developed in healthy active children, and may overestimate sleep in this largely sedentary hospital setting where patients remain in bed much of the day and night. | NR |
| Vyhlidal 2023 | NR | NR | NR |
| Merz 2023 | NR | NR | NR |
| Wu 2023 | 2 patients withdrew from discomfort of wearing actigraph on hip. | NR | NR |
| Van Hulst 2023 | 11 participants refused to wear actigraph. | NR | NR |
| Withycombe 2022 | NR | 4 patients had accelerometer malfunctions. | NR |
| Gotte 2023 | NR | NR | NR |
| Miller 2021 | NR | NR | NR |
| Steur 2020 | NR | NR | NR |
| Rogers 2020 | NR | NR | NR |
| Steur 2020 | NR | NR | NR |
| Rogers 2019 | NR | NR | No adverse events. |
| Van Dijk-Lokkart 2019 | NR | NR | NR |
| Hamari 2019 | NR | NR | NR |
| Long 2018 | Barriers to implementation was around the intervention activity not the watch. | NR | NR |
| Graef 2018 | NR | NR | NR |
| Zupanec 2017 | Six patients withdrew from the study, with some (exact number unknown) unable to tolerate wearing the device. | NR | NR |
| Gundle 2017 | NR | NR | NR |
| Gotte 2017 | NR | NR | NR |
| Sabel 2016 | NR | NR | NR |
| Braam 2016 | NR | Memory of the wearable device did not allow for 15 second epoch for 7 days. Could only collect for 4 days. | NR |
| **Wearable Device Use: Investigational Tool (n=16)** | | | |
| Misawa 2024 | Participants performed 91.2% of the VR intervention.  1 patient withdrew (due to time constraints). | No issues with data syncing. | No adverse events related to cybersickness were reported. However, some patients experienced fatigue, dizziness, disorientation, and instability, though none of these symptoms led to study drop-outs. |
| Savas 2024 | The BioVirtualPed relies on Oculus devices, which come with a significant price tag. However, all participants provided positive feedback. | NR | No reported side effects and/or adverse effects. |
| Savas 2024 | NR | NR | NR |
| Ovans 2018 | One patient dropped out before completing week 1, and four others were inconsistent in wearing and using the device. Eleven participants continued through the extended study. | Four patients completed the initial 12 weeks but declined to continue wearing the device for an additional 12 weeks, either because they no longer wanted to wear it or due to frustration with the device not functioning properly. | No adverse effects reported in this cohort. |
| Ha 2022 | 59% opt in rate but of the 30 participants who consented, 70% completed the study. 43% reported enjoying the wearable device. Participants would prefer to see their data (unable to with this wearable). | More than half the participants reported at least 1 technical issue. One patient withdrew as a result, other patients resolved the issues with a telehealth call to research team. | No adverse events. |
| Krnavek 2021 | NR | NR | NR |
| Gotte 2018 | 94% of patients recommended fitness tracker intervention. 86% said it was easy to use. | Some issues with detecting moderate activity with fitbit. | NR |
| Haemmerli 2022 | NR | NR | NR |
| Koenig 2021 | Most participants considered it a suitable device as it is comfortable to wear and easy to use. A few participants reported problems with the device such as it being too big or difficult to charge. | Wearable device sometimes assigned good quality to an incorrectly measured vital sign. This was most obvious for a 6-year-old child who did not wear the device at all. Though during the first 2 days the device was switched on and recorded pseudo-vital signs in the box, assigning good quality to respiration rate and core temperature.  8 participants experienced technically issues e.g. not connecting with app. | Superficial skin lesion (skin healed quickly once removed). Participants reported skin irritation (4), itching (3) and sweating (7). |
| Devine 2020 | NR | NR | NR |
| Yurkiewicz 2018 | 85% enjoyed wearing the fitbit, 12% found the fitbit uncomfortable, 15% found it challenging that the watch is not waterproof. | 9% had issues with syncing the fitbit to the ipad. | NR |
| Mendoza 2017 | Fitbit was selected for its ease of use. They had no issues recruiting 60 patients. Using a well known/popular device helped with engagement. | NR | NR |
| Le 2017 | 4 participants were concerned about the security of the clip-on style fitbit with concerns it would fall off while exercising. All participants would recommend the device, and 20% suggested patients receive it during therapy. Participants suggested another device that is more secure, accurate and waterproof. | 5 lost their device, 3 find the device before replacement device was sent and 2 could not find the device and declined a replacement. | NR |
| Hooke 2016 | All participants wore the device with no issue (minus 6-year-old who was removed from the study). | 6-year-old patient kept forgetting fitbit at school or attaching it to family dog instead. | NR |
| Fuemmeler 2020 | NR | NR | NR |
| Howell 2018 | 16 did not complete the intervention, 8 were lost to follow up, 4 never accessed the website to provide data. | NR | NR |

**Table 2:** **Reported benefits or inefficacies of the wearable devices.**

NR, not reported
