# Supplementary material for: Utilization of wearable devices in pediatric oncology: A Scoping Review
Source: Research Square preprint supplement (doi:10.21203/rs.3.rs-6517066/v1), 2025-05-07
Supplement: Supplementary file 2 [file abbad1aaaccf262b1e9b1bc8.docx]

**Supplementary Material 1: Detailed characteristics of included studies and participants.**

| **Ref** | **Country** | **Total sample size** | **Sex (%F)** | **Age (Mean/Median)** | **Age Spread (SD/IQR/Range)** | **Cancer Diagnosis** | **Treatment Status** | **Study Location** |
| --- | --- | --- | --- | --- | --- | --- | --- | --- |
| **Wearable Device Use: Data Collection Tool (n=61)** | | | | | | | | |
| Muller 2016 | DE | 150 | 48.7% | M 10.7 | SD 4.3 | 57.4% Leukemia/Lymphoma  25.3% CNS/Neuro-oncology  17.3% Sarcoma | Off | Mixed |
| Rosen 2015 | US | 50 | 56% | Mdn 4.5 | NR | 100% Leukemia/Lymphoma | On | Mixed |
| Muller 2014 | DE | 21 | **Control** 54.5%  **Intervention** 60% | **Control**  M 12.2  **Intervention**  M 15.2 | NR | 100% Sarcoma | On | Mixed |
| Rogers 2014 | US | 87 | 34.5% | M 8.8 | SD 3.3 | 100% Leukemia/Lymphoma | On | Outpatient |
| Marmol-Perez 2024 | ES | 116 | 42.2% | M 12.1 | SD 3.3 | 50.9% Leukemia/Lymphoma  16.4% CNS/Neuro-oncology  15.4% Solid Tumors  11.2% Sarcoma  5.2% Histiocytosis  0.9% Unknown | Off | Outpatient |
| Bratteteig 2024 | NO  CH | 270 | **Control**  50%  **Intervention**  47% | **Control**  M 13.2  **Intervention**  M 13.4 | **Control**  SD 2.6  **Intervention**  SD 2.5 | **Control**  Healthy participants  **Intervention**  59.9% Leukemia/Lymphoma  28.7% Other  11.5% CNS/Neuro-oncology | Off | Outpatient |
| Ha 2023 | AU | 37 | 54.1% | M 11.7 | SD 3 | 81.1% Leukemia/Lymphoma  21.6% Other  13.5% CNS/Neuro-oncology | Off | Outpatient |
| Grydeland 2023 | NO  DE  DK  FI  CH | 432 | 47.7% | M 12.2 | SD 2.2 | 57.9% Leukemia/Lymphoma  17.8% Other  16% CNS/Neuro-oncology  8.3% Sarcoma | Off | Outpatient |
| Hooke 2023 | US | 15 | 73.3% | M 10.3 | SD 4.5 | 100% Leukemia/Lymphoma | On | Mixed |
| Gaser 2022 | DE | 41 | 34.1% | M 10 | SD 4 | 100% Leukemia/Lymphoma | On | Mixed |
| Rehorst-Kleinlugtenbelt 2019 | NL | 25 | 36% | Mdn 8.2 | NR | 68% Leukemia/Lymphoma  32% Solid Tumors | On | Mixed |
| Nunes 2019 | BR PT  US | 118 | 66.1% | NR | R 8-18 | 56.8% Leukemia/Lymphoma  23.7% Other  19.5% Sarcoma | On | Inpatient |
| Johnson 2018 | US | 21 | 47.6% | NR | R 8-12 | 100% CNS/Neuro-oncology | Off | Outpatient |
| Darezzo 2015 | US | 35 | 51.4% | NR | R 8-17 | 42.9% Leukemia/Lymphoma  31.4% Sarcoma  25.7% Other | On | Outpatient |
| Van Deuren 2020 | NL | 231 | **CFS**  73.5%  **ACS**  50.5%  **CCS**  73.5% | **CFS**  M 24.19  **ACS**  M 45.60  **CCS**  M 23.27 | **CFS**  SD 6.27  **ACS**  SD 9.46  **CCS**  SD 6.97 | **CFS**  Chronic Fatigue Syndrome  **ACS**  71.6% Solid Tumors  17.9% Leukemia/Lymphoma  7.4% Other  3.2% Sarcoma  **CCS**  58.8% Leukemia/Lymphoma  17.6% Sarcoma  11.8% Solid Tumors  8.8% CNS/Neuro-oncology  2.9% Other | Off | Outpatient |
| Traube 2020 | US | 56 | 46.4% | NR | R 0-18 | 26.8% Other  25% Sarcoma  32.1% CNS/Neuro-oncology  16.1% Leukemia/Lymphoma | On | Inpatient |
| Hooke 2019 | US | 57 | **Control**  48%  **Intervention**  37% | **Control**  M 12.8  **Intervention**  M 12 | **Control**  SD 3.3  **Intervention**  SD 3.6 | **Control**  63% Leukemia/Lymphoma  37% Solid Tumors  **Intervention**  62.5% Leukemia/Lymphoma  37.5% Solid Tumors | On | Mixed |
| Matthews 2014 | US | 52 | NR | **Control**  M 6.2  **Intervention**  M 6.4 | NR | **Control**  Healthy Participants  **Intervention**  100% Leukemia/Lymphoma | On | Outpatient |
| Nessle 2022 | US | 2 | 50% | NR | 1 & 17 (n=2) | 100% Leukemia/Lymphoma | On | Mixed |
| Fiuza-Luces 2017 | ES | 49 | **Control**  28%  **Intervention**  29.2% | **Control**  M 11  **Intervention**  M 10 | **Control**  SD 1  **Intervention**  SD 1 | **Control**  48% Sarcoma  20% Leukemia/Lymphoma  20% CNS/Neuro-oncology  4% Solid Tumors  **Intervention**  54% Leukemia/Lymphoma  50% Sarcoma  8% CNS/Neuro-oncology | On | Inpatient |
| Grimshaw 2024 | AU | 20 | 45% | Mdn 13 | NR | 90% Leukemia/Lymphoma  5% CNS/Neuro-oncology  5% Sarcoma | On | Inpatient |
| Pitt 2023 | AUS | 30 | 56.7% | M 22.2 | NR | 76.7% Leukemia/Lymphoma  13.3% Solid Tumors  10% CNS/Neuro-oncology | Off | Outpatient |
| Williamson 2023 | US | 44 | 52.3% | M15.1 | SD 1.2 | 54.5% Leukemia/Lymphoma  41% Solid Tumors  4.5% Other Non-Malignant | Off | Outpatient |
| Hoag 2022 | US | 49 | **Control**  48.3%  **Intervention**  45% | **Control**  Mdn 13  **Intervention**  Mdn 12 | **Control**  IQR 11-15  **Intervention**  IQR 10.5-15 | **Control**  55.2% Leukemia/lymphoma  20.7% Other Non-malignant  17.2% Solid Tumors  6.9% CNS/Neuro-oncology  **Intervention**  70% Leukemia/Lymphoma  15% Solid Tumors  10% Other Non-malignant  5% CNS/Neuro-oncology | On | Inpatient |
| Koenig 2024 | CH | 20 | 35% | Mdn 8 | NR | 60% Leukemia/Lymphoma  25% Solid Tumors  15% CNS/Neuro-oncology | On | Mixed |
| Swartz 2020 | US | 80 | 46.3% | M 18.1 | SD 7.5 | 38.8% Sarcoma  37.6% Leukemia/Lymphoma  16.3% Other  5% CNS/Neuro-oncology  2.5% Solid Tumors | Mixed | Mixed |
| Dalla 2023 | AU | 14 | 28.7% | M 8 | NR | 50% Leukemia/Lymphoma  50% Solid Tumors | On | Inpatient |
| DeNysschen 2021 | US | 24 | 41.7% | M 16.6 | SD 2.8 | NR | Off | Outpatient |
| Wang 2024 | US | 13 | 53.8% | Mdn 13.2 | NR | 61.5% Malignancies  23.1% Bone Marrow Failure  7.7% Hemoglobinopathy  7.7% Autoimmune Disease | On | Inpatient |
| Lazar 2023 | RO | 35 | 48.6% | M 5.97 | SD 3.76 | 100% Leukemia/Lymphoma | On | Inpatient |
| Vyhlidal 2022 | CZ | 64 | **Control**  68.4%  **Intervention**  53.8% | NR | R 7-15 | **Control**  Healthy participants  **Intervention**  53.8% Leukemia/Lymphoma  46.2% Solid Tumors | Off | Inpatient |
| Bratteteig 2022 | NO  CH | 157 | 46.5% | M 13.4 | SD 2.5 | 59.9% Leukemia/Lymphoma  28.7% Other  11.5% CNS/Neuro-oncology | Off | Outpatient |
| Gaser 2022 | DE | 41 | **Control**  40%  **Intervention**  28.6% | **Control**  M 9.7  **Intervention**  M 10.2 | **Control**  SD 3.9  **Intervention**  SD 4.2 | 100% Leukemia/Lymphoma | On | Mixed |
| Vyhlidal 2022 | CZ | 26 | 53.8% | NR | R 7-15 | 53.8% Leukemia/Lymphoma  46.2% Solid Tumors | Off | Outpatient |
| Steur 2020 | NL | 126 | 40.50% | Mdn 5.1 | IQR 3.1-9.3 | 100% ALL | On | Outpatient |
| Pickering 2021 | DK | 68 | 38.2% | **CRST**  M 12.2  **Non-CRST** M 11.9 | NR | 100% CNS/Neuro-oncology | Off | Outpatient |
| Rogers 2020 | US | 59 | **Control**  66.7%  **Intervention** 55.2%` | **Control**  M 15.5  **Intervention** M 16.2 | **Control**  SD 1.6  **Intervention** SD 1.6 | **Control**  Healthy participants  **Intervention**  82.8% Leukemia/Lymphoma  10.3% Sarcoma  6.9% CNS/Neuro-oncology | Off | Outpatient |
| Orsey 2016 | US | 18 | 16.7% | NR | R 8-18 | 77.8% Leukemia/Lymphoma  16.7% CNS/Neuro-oncology  5.6% Solid Tumors | On | Outpatient |
| Setoyama 2016 | JP | 11 | 63.6% | M 5.5 | NR | 100% Leukemia/Lymphoma | On | Mixed |
| Jacobs 2016 | US | 34 | **Control**  33%  **Intervention**  25% | **Control**  M 16  **Intervention**  M 15.5 | **Control**  SD 2.5  **Intervention**  SD 2.6 | **Control**  66.7% Leukemia/Lymphoma  22.2 Sarcoma  11.1% CNS/Neuro-oncology    **Intervention**  81.3% Leukemia/Lymphoma  18.7% Sarcoma | On | Inpatient |
| Daniel 2024 | US | 50 | 48% | M 14.06 | SD 3.58 | 56% Leukemia/Lymphoma  32% Other Non-Malignant  8% Solid Tumors  2% CNS/Neuro-oncology  2% Other Malignant | On | Inpatient |
| Vyhlidal 2023 | CZ | 41 | **Control**  62%  **Intervention**  45% | Mdn 24.2 | IQR 5.4 | **Control**  Healthy participants  **Intervention**  100% Leukemia/Lymphoma | Off | Outpatient |
| Merz 2023 | CA | 79 | 45.8% | **Control**  M 11.12  **SSC**  M 12  **CS**  M 10.97  **Intervention**  M 11.13 | **Control**  SD 2.34  **SSC**  SD 3.54  **CS**  SD 2.35  **Intervention**  SD 2.53 | **Control/SSC/CS**  Healthy participants  **Intervention**  100% Leukemia/Lymphoma | Off | Outpatient |
| Wu 2023 | TW | 32 | 40.6% | Mdn 15 | IQR 3.75 | 68.8% Leukemia/Lymphoma  31.2% Other Malignancies | On | Mixed |
| Van Hulst 2023 | NL | 52 | **Control**  38.5%  **Intervention** 38.5% | Mdn 5.5 | IQR 3-18.8 | 100% Leukemia/Lymphoma | On | Inpatient |
| Withycombe 2022 | US | 65 | 52.3% | M 13.4 | SD 2.8 | 58.5% Leukemia/Lymphoma  24.6% Solid Tumors  16.9% CNS/Neuro-oncology | On | Mixed |
| Gotte 2023 | DE | 1378 | **Control**  52.3%  **Intervention**  50% | **Control**  NR  **Intervention**  M 12.3 | **Control**  R 9-15  **Intervention**  SD 1.9 | **Control**  Healthy participants  **Intervention**  46% Leukemia/Lymphoma  32.4% Other  21.6% CNS/Neuro-oncology | Off | Outpatient |
| Miller 2021 | US | 19 | 52.6% | M 19.7 | NR | 50% Other  33.4% Leukemia/Lymphoma  16.7% CNS/Neuro-oncology | Off | Outpatient |
| Steur 2020 | NL | 124 | 39.5% | Mdn 5.1 | IQR 3.1-9.2 | 100% Leukemia/Lymphoma | On | Outpatient |
| Rogers 2020 | US | 33 | 39.4% | M 9.5 | SD 3.9 | 100% CNS/Neuro-oncology | On | Inpatient |
| Steur 2020 | NL | 194 | **Control**  44.2%  **Intervention** 40.70% | **Control**  M 4.8  **Intervention** M 5 | NR | 100% Leukemia/Lymphoma | On | Outpatient |
| Rogers 2019 | US | 33 | 39.4% | M 9.5 | SD 3.9 | 100% CNS/Neuro-oncology | On | Mixed |
| Van Dijk-Lokkart 2019 | NL | 68 | 47.1% | M 13.2 | SD 3.1 | 67.6% Leukemia/Lymphoma  22.1% Solid Tumors  10.3% CNS/Neuro-oncology | Mixed | Outpatient |
| Hamari 2019 | FI | 36 | **Control** 36.3%  **Intervention** 29.4% | **Control**  M 7.9  **Intervention** M 7.8 | NR | **Control**  76.1% Leukemia/Lymphoma  14.3% Other  9.5% Wilms Tumors  **Intervention**  80% ALL  20% Other Malignant | On | Mixed |
| Long 2018 | AU | 13 | 53.8% | Mdn 19 | NR | 100% CNS/Neuro-oncology | Off | Outpatient |
| Graef 2018 | US | 37 | 43.2% | M 9.6 | SD 4.2 | 100% CNS/Neuro-oncology | On | Inpatient |
| Zupanec 2017 | CA | 20 | **Control** 11.1%  **Intervention** 9.1% | **Control**  M 6.2  **Intervention** M 6.3 | **Control**  SD 2  **Intervention** SD 1.8 | 100% Leukemia/Lymphoma | On | Outpatient |
| Gundle 2017 | US | 25 | 56% | M 16 | SD 3.3 | 100% Sarcoma | Mixed | Mixed |
| Gotte 2017 | DE | 28 | 42.9% | M 13.8 | SD 2.8 | 48.6% Sarcoma  40.5% Leukemia/Lymphoma  10.8% Solid Tumors | On | Mixed |
| Sabel 2016 | SE | 13 | **Control**  50%  **Intervention**  57.10% | **Control**  M 13.2  **Intervention** M11.9 | **Control**  SD 1.9  **Intervention** SD 3.6 | 100% CNS/Neuro-Oncology | Off | Outpatient |
| Braam 2016 | NL | 60 | 41.7% | M 13.8 | NR | 64.9% Leukemia/Lymphoma  13.3% CNS/Neuro-oncology  16.7% Sarcoma  5% Other | Off | Outpatient |
| **Wearable Device Use: Investigational Tool (n=16)** | | | | | | | | |
| Misawa 2024 | CA | 10 | 30% | NR | R 10-19 | 100% CNS/Neuro-oncology | Mixed | Outpatient |
| Savas 2024 | TR | 15 | 46.7% | M 9.66 | SD 2.10 | 73.3% Leukemia/Lymphoma  20% CNS/Neuro-oncology  6.7% Sarcoma | On | Inpatient |
| Savas 2024 | TR | 62 | **Control**  51.6%  **Intervention** 45.2% | **Control**  M 9.74  **Intervention** M 9.33 | **Control**  SD 1.76  **Intervention** SD 2.08 | **Control**  74.3% Leukemia/Lymphoma  22.6% Sarcoma  3.2% CNS/Neuro-oncology  **Intervention**  64.5% Leukemia/Lymphoma  22.6% Sarcoma  12.9% CNS/Neuro-oncology | On | Inpatient |
| Ovans 2018 | US | 15 | 33.3% | M 11.47 | SD 3.33 | 100% CNS/Neuro-oncology | Mixed | Outpatient |
| Ha 2022 | AU | 27 | 44.4% | M 10 | SD 1.5 | 66.7% Leukemia/Lymphoma  18.5% Other  14.8% CNS/Neuro-oncology | Mixed | Outpatient |
| Krnavek 2021 | US | 64 | **Control**  62.5%  **Intervention**  43.8% | **Control**  M 22.8  **Intervention**  M 20.5 | NR | **Control**  Healthy participants  **Intervention**  68.8% Leukemia/Lymphoma  15.6% Solid Tumors  9.4% CNS/Neuro-oncology  6.3% Sarcoma | Off | Inpatient |
| Gotte 2018 | DE | 40 | **Control**  52.6%  **Intervention** 38.1% | **Control**  M 15.4  **Intervention** M 14.5 | **Control**  SD 3.7  **Intervention** SD 3.9 | **Control**  60% Leukemia/Lymphoma  40% Sarcoma  **Intervention**  80% Leukemia/Lymphoma  20% Sarcoma | On | Outpatient |
| Haemmerli 2022 | CH | 20 | 45% | M 6 | NR | 60% Leukemia/Lymphoma  15% CNS/Neuro-oncology  15% Solid Tumors  10% Other | On | Mixed |
| Koenig 2021 | CH | 20 | 45% | Mdn 6 | NR | 60% Leukemia/Lymphoma  15% CNS/Neuro-oncology  15% Solid Tumors  10% Other | On | Mixed |
| Devine 2020 | US | 49 | **Control**  37.5%  **Intervention** 60% | **Control**  M 18.25  **Intervention** M 18.76 | **Control**  SD 3.6  **Intervention** SD 3.9 | **Control**  87.5% Leukemia/Lymphoma  12.5% Solid Tumors  **Intervention**  76% Leukemia/Lymphoma  12% CNS/Neuro-oncology  12% Solid Tumors | Off | Outpatient |
| Yurkiewicz 2018 | US | 33 | 57.6% | M 22 | NR | 63.7% Leukemia/Lymphoma  21.2% Sarcoma  15.2% Other | On | Mixed |
| Mendoza 2017 | US | 59 | **Control**  60%  **Intervention**  58.60% | **Control**  M 16.3  **Intervention** M 16.9 | **Control**  SD 1.5  **Intervention** SD 1.5 | **Control**  48.3% Solid Tumors  44.8% Leukemia/Lymphoma  6.9% CNS/Neuro-oncology  **Intervention**  40% Leukemia/Lymphoma  30% Solid Tumors  16.7% Sarcoma  10% CNS/Neuro-oncology  3.3% Other | Off | Outpatient |
| Le 2017 | US | 19 | 73.7% | M 24.3 | SD 5.8 | 63.2% Leukemia  26.3% Sarcoma  5.3% CNS/Neuro-oncology  5.3% Solid Tumors | Off | Outpatient |
| Hooke 2016 | US | 16 | 68.8% | M 8.69 | SD 3.09 | 100% Leukemia/Lymphoma | On | Mixed |
| Fuemmeler 2020 | US | 15 | 40% | M 14.8 | SD 1.97 | 100% Leukemia/Lymphoma | Off | Outpatient |
| Howell 2018 | US | 78 | **Control**  56%  **Intervention** 54.7% | **Control**  M 12.4  **Intervention** M 12.8 | NR | **Control**  41.7% Leukemia/Lymphoma  25% CNS/Neuro-oncology  16.6% Solid Tumors  12.5% Other  4.2% Sarcoma  **Intervention**  31.5% Leukemia/Lymphoma  31.4% CNS/Neuro-oncology  26% Solid Tumor  9.3% Sarcoma    1.9% Other | Off | Outpatient |

**Table 1: Detailed characteristics of included studies and participants.**

**Countries** – AU, Australia; BR, Brazil; CA, Canada; CH, Switzerland; CZ, Czech Republic; DE, Germany; DK, Denmark; ES, Spain; FI, Finland; JP, Japan; NL, Netherlands; NO, Norway; PT, Portugal; RO, Romania; SE, Sweden; TW, Taiwan; US, United States.
**Statistical Terms** – IQR, interquartile range; M, mean; Mdn, median; NR, not reported; R, range; SD, standard deviation.
**Clinical/Study Groups** – ACS, adult cancer survivors; CFS, chronic fatigue syndrome; CCS, childhood cancer survivors; CRST, circadian regulatory system tumors; Non-CRST, non-circadian regulatory system tumors; CS, control sibling; SSC, survivor sibling control.

**Diagnostic categories were grouped as follows:**
**Leukemia/Lymphoma** – Includes acute lymphoblastic leukemia (ALL), acute myeloid leukemia (AML), Burkitt lymphoma, Hodgkin and non-Hodgkin lymphoma, T-lymphoblastic lymphoma, chronic myeloid leukemia (CML), diffuse large B-cell lymphoma, and general references to leukemia/lymphoma or hematological malignancies.
**CNS/Neuro-Oncology** – Includes CNS tumors, brain tumors, medulloblastoma, neuroblastoma, ganglioneuroblastoma, germinoma, non-germinoma, and circadian-related brain tumors.
**Sarcoma** – Includes Ewing sarcoma, osteosarcoma, rhabdomyosarcoma, non-rhabdomyosarcoma, soft tissue sarcomas, and bone tumors.
**Solid Tumors** – Includes Wilms tumor, retinoblastoma, germ cell tumors, hepatic tumors, testicular cancer, breast cancer, ovarian cancer, malignant epithelial tumors, and other malignant epithelial neoplasms.
**Other Malignant** – Diagnoses listed as “other” in the original source.
**Unknown** – Diagnoses listed as “unknown” in the original source.
**Non-Malignant** – Includes aplastic anemia, sickle cell disease, bone marrow failure, hemoglobinopathies, autoimmune disease, histiocytosis, other non-malignant diagnoses, and unspecified non-malignant conditions.
